# Supplementary material for: Application of the urban exposome framework using drinking water and quality of life indicators: a proof-of-concept study in Limassol, Cyprus
Source: PeerJ. 2019 May 24;7:e6851. doi: 10.7717/peerj.6851 (PMC6536114; doi:10.7717/peerj.6851)
Supplement: Supplemental Information 8 [file peerj-07-6851-s008.xlsx]

## Sheet: Table_S62019-03-01
variable	term	estimate	std.error	statistic	p.value	conf.low	conf.high	n (%)	Outcome	FDR
FinancialIssuesDentalCareREC	valueYes	-0.794	0.188	-4.223	0	-1.167	-0.422	18 (14.1)	GeneralHealth	0
Depression12MREC	valueYes	-1.448	0.377	-3.839	0	-2.195	-0.7	3 (2.8)	GeneralHealth	0
Hypertension12MREC	valueYes	11.714	0.58	4.24	0	3.858	38.429	19 (16.2)	ChronicDisease	0
Age	value	3.293	0.233	5.105	0	2.128	5.337	NA	Disease12M	0
JointProblems12MREC	valueYes	-0.621	0.19	-3.266	0.001	-0.998	-0.244	12 (10.8)	GeneralHealth	0.0215
BackProblems12MREC	valueYes	-0.5	0.142	-3.511	0.001	-0.782	-0.218	37 (32.2)	GeneralHealth	0.0215
Age	value	-0.194	0.063	-3.084	0.002	-0.318	-0.07	NA	GeneralHealth	0.0368571
NeckProblems12MREC	valueYes	-0.479	0.157	-3.052	0.003	-0.79	-0.168	20 (17.5)	GeneralHealth	0.043
BackProblems12MREC	valueYes	4.402	0.501	2.957	0.003	1.67	12.124	37 (32.2)	ChronicDisease	0.043
Age	value	2.074	0.256	2.844	0.004	1.297	3.589	NA	ChronicDisease	0.0469091
NeckProblems12MREC	valueYes	4.657	0.541	2.845	0.004	1.602	13.623	20 (17.5)	ChronicDisease	0.0469091
Asthma12MREC	valueYes	6.071	0.695	2.595	0.009	1.515	24.61	10 (8.5)	ChronicDisease	0.09675
ProximityGreenSpace	valueDo not know	-0.708	0.295	-2.4	0.018	-1.292	-0.124	7 (5.3)	GeneralHealth	0.175071
LongWaitingListHCDelay12MREC	valueYes	4.5	0.641	2.346	0.019	1.311	16.672	15 (11.9)	ChronicDisease	0.175071
Hypertension12MREC	valueYes	-0.354	0.155	-2.279	0.024	-0.661	-0.046	19 (16.2)	GeneralHealth	0.2064
Alergies12MREC	valueYes	3.846	0.607	2.22	0.026	1.129	12.624	17 (15.5)	ChronicDisease	0.209625
Mopping_days_week	value	-0.135	0.064	-2.131	0.035	-0.261	-0.01	NA	GeneralHealth	0.265588
ActivitiesInGreenSpace	valueDo not know	-0.736	0.354	-2.078	0.04	-1.437	-0.035	9 (6.8)	GeneralHealth	0.278368
Spring_water_glasses_day	value	0.506	0.333	-2.045	0.041	0.191	0.835	NA	Disease12M	0.278368
Dish_washing_days_week	value	1.431	0.181	1.983	0.047	1.009	2.058	NA	Disease12M	0.30315
BMI	value	-0.118	0.061	-1.937	0.055	-0.238	0.003	NA	GeneralHealth	0.306375
LiverDisorders12MREC	valueYes	-0.927	0.478	-1.939	0.055	-1.875	0.02	2 (1.8)	GeneralHealth	0.306375
Depression12MREC	valueYes	10.933	1.257	1.904	0.057	0.988	244.238	3 (2.8)	ChronicDisease	0.306375
Mopping_days_week	value	1.423	0.184	1.921	0.055	0.998	2.058	NA	Disease12M	0.306375
FinancialIssuesDentalCareREC	valueYes	3.178	0.615	1.881	0.06	0.995	11.485	18 (14.1)	Disease12M	0.3096
CVD12MREC	valueYes	-0.907	0.483	-1.879	0.063	-1.864	0.05	2 (1.7)	GeneralHealth	0.312577
FreeChlorine	value	1.475	0.211	1.837	0.066	0.974	2.251	NA	ChronicDisease	0.315333
LongWaitingListHCDelay12MREC	valueNo, I didn't need care	0.244	0.141	1.736	0.085	-0.034	0.523	68 (54)	GeneralHealth	0.382552
Mopping_days_week	value	1.462	0.221	1.717	0.086	0.95	2.275	NA	ChronicDisease	0.382552
Spring_water_glasses_day	value	0.102	0.063	1.615	0.109	-0.023	0.226	NA	GeneralHealth	0.393973
Bathroom_cleaning_days_week	value	-0.103	0.064	-1.607	0.111	-0.23	0.024	NA	GeneralHealth	0.393973
Alergies12MREC	valueYes	-0.286	0.179	-1.6	0.113	-0.64	0.068	17 (15.5)	GeneralHealth	0.393973
LongWaitingListHCDelay12MREC	valueNo, I didn't need care	0.421	0.525	-1.647	0.1	0.146	1.176	68 (54)	ChronicDisease	0.393973
FinancialIssuesDentalCareREC	valueYes	2.917	0.642	1.667	0.095	0.824	10.518	18 (14.1)	ChronicDisease	0.393973
LongWaitingListHCDelay12MREC	valueNo, I didn't need care	0.527	0.398	-1.61	0.107	0.238	1.14	68 (54)	Disease12M	0.393973
ActivitiesInGreenSpace	valueDo not know	5.833	1.085	1.626	0.104	0.777	61.719	9 (6.8)	Disease12M	0.393973
ActivitiesInGreenSpace	valueProbably agree	4.333	0.9	1.629	0.103	0.777	28.663	18 (13.6)	Disease12M	0.393973
LongWaitingListHCDelay12MREC	valueYes	-0.322	0.217	-1.489	0.139	-0.751	0.106	15 (11.9)	GeneralHealth	0.415667
FinancialIssuesDentalCareREC	valueNo, I didn't need	0.193	0.131	1.468	0.145	-0.067	0.453	70 (54.7)	GeneralHealth	0.415667
ProximityGreenSpace	valueProbably disagree	-0.305	0.207	-1.474	0.143	-0.714	0.104	17 (12.9)	GeneralHealth	0.415667
Diabetes12MREC	valueYes	-0.43	0.282	-1.523	0.131	-0.989	0.129	6 (5.3)	GeneralHealth	0.415667
TCM	value	0.655	0.284	-1.489	0.136	0.351	1.081	NA	ChronicDisease	0.415667
TBM	value	0.654	0.29	-1.464	0.143	0.346	1.081	NA	ChronicDisease	0.415667
Water_from_vending_machines_glasses_day	value	1.36	0.21	1.462	0.144	0.892	2.152	NA	ChronicDisease	0.415667
ProximityGreenSpace	valueProbably disagree	2.567	0.62	1.521	0.128	0.751	8.781	17 (12.9)	ChronicDisease	0.415667
Asthma12MREC	valueYes	-0.321	0.224	-1.428	0.156	-0.765	0.124	10 (8.5)	GeneralHealth	0.437478
Sex	valueMale	0.172	0.132	1.3	0.196	-0.09	0.433	50 (37.9)	GeneralHealth	0.473
ActivitiesInGreenSpace	valueProbably agree	-0.403	0.31	-1.3	0.196	-1.016	0.21	18 (13.6)	GeneralHealth	0.473
Resporatory12MREC	valueYes	0.418	0.312	1.338	0.183	-0.201	1.037	5 (4.3)	GeneralHealth	0.473
TTHMs	value	0.695	0.278	-1.312	0.19	0.377	1.128	NA	ChronicDisease	0.473
BrTHMs	value	0.701	0.275	-1.288	0.198	0.382	1.135	NA	ChronicDisease	0.473
SomeonetoHelpinNeighborhood	valueDo not know	0.231	1.09	-1.345	0.179	0.012	1.356	15 (11.4)	ChronicDisease	0.473
JointProblems12MREC	valueYes	2.406	0.671	1.308	0.191	0.586	8.673	12 (10.8)	ChronicDisease	0.473
ProximityGreenSpace	valueDo not know	4.385	1.121	1.318	0.188	0.672	86.452	7 (5.3)	Disease12M	0.473
ActivitiesInGreenSpace	valueCompletely disagree	-0.35	0.277	-1.264	0.208	-0.899	0.198	51 (38.6)	GeneralHealth	0.487855
ActivitiesInGreenSpace	valueProbably agree	4.2	1.187	1.209	0.227	0.541	88.738	18 (13.6)	ChronicDisease	0.502881
LongWaitingListHCDelay12MREC	valueYes	2.37	0.718	1.201	0.23	0.635	11.558	15 (11.9)	Disease12M	0.502881
FinancialIssuesDentalCareREC	valueNo, I didn't need	1.63	0.399	1.223	0.221	0.748	3.596	70 (54.7)	Disease12M	0.502881
ActivitiesInGreenSpace	valueCompletely disagree	2.583	0.785	1.21	0.226	0.571	13.743	51 (38.6)	Disease12M	0.502881
Cigarettes_daily_on_average	value	-0.078	0.068	-1.152	0.252	-0.213	0.056	NA	GeneralHealth	0.528484
Tap_water_glasses_day	value	0.744	0.257	-1.147	0.252	0.424	1.182	NA	ChronicDisease	0.528484
SomeonetoHelpinNeighborhood	valueDo not know	0.506	0.598	-1.14	0.254	0.149	1.612	15 (11.4)	Disease12M	0.528484
CVD12MREC	valueYes	4.833	1.438	1.096	0.273	0.185	126.104	2 (1.7)	ChronicDisease	0.559
DBCM	value	1.222	0.187	1.069	0.285	0.858	1.804	NA	Disease12M	0.574453
DBCM	value	0.758	0.262	-1.059	0.29	0.425	1.202	NA	ChronicDisease	0.575538
SomeonetoHelpinNeighborhood	valueProbably disagree	0.333	0.32	1.041	0.3	-0.3	0.967	6 (4.5)	GeneralHealth	0.577612
BDCM	value	0.763	0.261	-1.036	0.3	0.428	1.211	NA	ChronicDisease	0.577612
Water_from_vending_machines_glasses_day	value	1.235	0.209	1.008	0.314	0.853	2.031	NA	Disease12M	0.594522
Other_glasses_day	value	1.555	0.442	0.999	0.318	0.897	5.212	NA	Disease12M	0.594522
BDCM	value	-0.059	0.065	-0.909	0.365	-0.186	0.069	NA	GeneralHealth	0.645
DBCM	value	-0.06	0.065	-0.926	0.356	-0.187	0.068	NA	GeneralHealth	0.645
Spring_water_glasses_day	value	0.73	0.345	-0.913	0.361	0.243	1.211	NA	ChronicDisease	0.645
Bathroom_cleaning_days_week	value	1.179	0.181	0.913	0.361	0.831	1.693	NA	Disease12M	0.645
Dish_washing_days_week	value	-0.055	0.065	-0.852	0.396	-0.183	0.073	NA	GeneralHealth	0.690324
BMI	value	1.199	0.218	0.834	0.404	0.777	1.841	NA	ChronicDisease	0.69488
Dish_washing_days_week	value	1.217	0.238	0.823	0.411	0.784	2.032	NA	ChronicDisease	0.697618
BDCM	value	1.158	0.183	0.801	0.423	0.816	1.689	NA	Disease12M	0.708662
ProximityGreenSpace	valueCompletely disagree	0.579	0.726	-0.753	0.452	0.118	2.218	23 (17.4)	ChronicDisease	0.738076
BMI	value	1.147	0.181	0.757	0.449	0.806	1.648	NA	Disease12M	0.738076
TTHMs	value	-0.045	0.065	-0.69	0.492	-0.172	0.083	NA	GeneralHealth	0.757107
BrTHMs	value	-0.045	0.065	-0.698	0.487	-0.173	0.083	NA	GeneralHealth	0.757107
Bathroom_cleaning_days_week	value	1.169	0.216	0.723	0.47	0.756	1.779	NA	ChronicDisease	0.757107
Cancer12MREC	valueYes	2.361	1.252	0.686	0.493	0.106	25.962	3 (2.6)	ChronicDisease	0.757107
SomeonetoHelpinNeighborhood	valueCompletely disagree	2.276	1.189	0.692	0.489	0.27	47.74	4 (3)	Disease12M	0.757107
ProximityGreenSpace	valueCompletely disagree	-0.118	0.186	-0.633	0.528	-0.486	0.25	23 (17.4)	GeneralHealth	0.766753
Other_glasses_day	value	1.121	0.181	0.629	0.529	0.714	1.681	NA	ChronicDisease	0.766753
TTHMs	value	1.121	0.182	0.63	0.529	0.791	1.636	NA	Disease12M	0.766753
BrTHMs	value	1.127	0.182	0.657	0.511	0.795	1.646	NA	Disease12M	0.766753
FreeChlorine	value	1.123	0.178	0.652	0.514	0.794	1.604	NA	Disease12M	0.766753
SomeonetoHelpinNeighborhood	valueDo not know	0.133	0.218	0.612	0.542	-0.298	0.565	15 (11.4)	GeneralHealth	0.776867
SomeonetoHelpinNeighborhood	valueProbably agree	-0.083	0.144	-0.58	0.563	-0.367	0.201	56 (42.4)	GeneralHealth	0.797837
Cigarettes_daily_on_average	value	0.862	0.261	-0.569	0.569	0.481	1.375	NA	ChronicDisease	0.797837
FinancialIssuesDentalCareREC	valueNo, I didn't need	0.75	0.517	-0.556	0.578	0.273	2.127	70 (54.7)	ChronicDisease	0.801742
TCM	value	-0.032	0.065	-0.501	0.618	-0.16	0.096	NA	GeneralHealth	0.805273
Other_glasses_day	value	0.032	0.064	0.503	0.616	-0.094	0.159	NA	GeneralHealth	0.805273
ActivitiesInGreenSpace	valueProbably disagree	-0.147	0.279	-0.525	0.6	-0.699	0.406	46 (34.8)	GeneralHealth	0.805273
Bottled_water_glasses_day	value	1.1	0.18	0.529	0.597	0.776	1.584	NA	Disease12M	0.805273
Cigarettes_daily_on_average	value	1.107	0.189	0.538	0.591	0.77	1.633	NA	Disease12M	0.805273
Sex	valueMale	0.832	0.362	-0.51	0.61	0.409	1.694	50 (37.9)	Disease12M	0.805273
SomeonetoHelpinNeighborhood	valueCompletely disagree	0.167	0.385	0.433	0.666	-0.596	0.929	4 (3)	GeneralHealth	0.821914
ProximityGreenSpace	valueDo not know	0.611	1.144	-0.431	0.667	0.03	4.261	7 (5.3)	ChronicDisease	0.821914
SomeonetoHelpinNeighborhood	valueProbably agree	0.811	0.461	-0.456	0.649	0.325	2.007	56 (42.4)	ChronicDisease	0.821914
ProximityGreenSpace	valueCompletely disagree	0.797	0.515	-0.44	0.66	0.288	2.204	23 (17.4)	Disease12M	0.821914
ActivitiesInGreenSpace	valueProbably disagree	1.4	0.788	0.427	0.669	0.306	7.478	46 (34.8)	Disease12M	0.821914
SomeonetoHelpinNeighborhood	valueProbably disagree	1.517	0.911	0.458	0.647	0.27	11.66	6 (4.5)	Disease12M	0.821914
TBM	value	-0.026	0.065	-0.398	0.691	-0.154	0.102	NA	GeneralHealth	0.833075
ActivitiesInGreenSpace	valueDo not know	1.714	1.345	0.401	0.689	0.13	42.528	9 (6.8)	ChronicDisease	0.833075
ActivitiesInGreenSpace	valueCompletely disagree	1.538	1.137	0.379	0.705	0.225	30.793	51 (38.6)	ChronicDisease	0.842083
Bottled_water_glasses_day	value	0.923	0.226	-0.356	0.722	0.572	1.405	NA	ChronicDisease	0.846709
Sex	valueMale	0.847	0.459	-0.361	0.718	0.332	2.045	50 (37.9)	ChronicDisease	0.846709
ProximityGreenSpace	valueProbably disagree	0.822	0.572	-0.342	0.732	0.266	2.564	17 (12.9)	Disease12M	0.850703
SomeonetoHelpinNeighborhood	valueProbably disagree	0.692	1.164	-0.316	0.752	0.034	5.238	6 (4.5)	ChronicDisease	0.866143
ProximityGreenSpace	valueProbably agree	0.893	0.438	-0.258	0.797	0.377	2.114	40 (30.3)	Disease12M	0.90985
Tap_water_glasses_day	value	0.013	0.064	0.208	0.835	-0.113	0.14	NA	GeneralHealth	0.912839
ProximityGreenSpace	valueProbably agree	0.885	0.565	-0.216	0.829	0.284	2.673	40 (30.3)	ChronicDisease	0.912839
TBM	value	1.044	0.178	0.242	0.809	0.737	1.508	NA	Disease12M	0.912839
Tap_water_glasses_day	value	1.042	0.178	0.23	0.818	0.736	1.492	NA	Disease12M	0.912839
SomeonetoHelpinNeighborhood	valueProbably agree	1.088	0.392	0.216	0.829	0.504	2.354	56 (42.4)	Disease12M	0.912839
ProximityGreenSpace	valueProbably agree	0.028	0.158	0.176	0.861	-0.284	0.34	40 (30.3)	GeneralHealth	0.917926
Cancer12MREC	valueYes	-0.072	0.396	-0.182	0.856	-0.858	0.713	3 (2.6)	GeneralHealth	0.917926
TCM	value	1.033	0.177	0.183	0.854	0.731	1.481	NA	Disease12M	0.917926
ActivitiesInGreenSpace	valueProbably disagree	1.2	1.157	0.158	0.875	0.165	24.501	46 (34.8)	ChronicDisease	0.925205
FreeChlorine	value	-0.009	0.065	-0.142	0.888	-0.137	0.119	NA	GeneralHealth	0.929008
Resporatory12MREC	valueYes	1.167	1.148	0.134	0.893	0.058	8.484	5 (4.3)	ChronicDisease	0.929008
Water_from_vending_machines_glasses_day	value	-0.007	0.064	-0.108	0.914	-0.134	0.12	NA	GeneralHealth	0.943248
Bottled_water_glasses_day	value	-0.004	0.064	-0.058	0.954	-0.13	0.123	NA	GeneralHealth	0.976714
SomeonetoHelpinNeighborhood	valueCompletely disagree	0	1199.77	-0.013	0.99	NA	6.62382e+52	4 (3)	ChronicDisease	0.992
Diabetes12MREC	valueYes	2.43924e+08	1978.09	0.01	0.992	0	NA	6 (5.3)	ChronicDisease	0.992
LiverDisorders12MREC	valueYes	8.41261e+07	1696.73	0.011	0.991	0	NA	2 (1.8)	ChronicDisease	0.992
